# Supplementary material for: The Streptococcal Protease SpeB Antagonizes the Biofilms of the Human Pathogen Staphylococcus aureus USA300 through Cleavage of the Staphylococcal SdrC Protein
Source: PubMed Central journal article supplement (PMC7221255; doi:10.1128/jb.00008-20), 2020-05-11
Supplement: JB.00008-20-s0003.pdf [file JB.00008-20-s0003.pdf]

1 Figure S1.

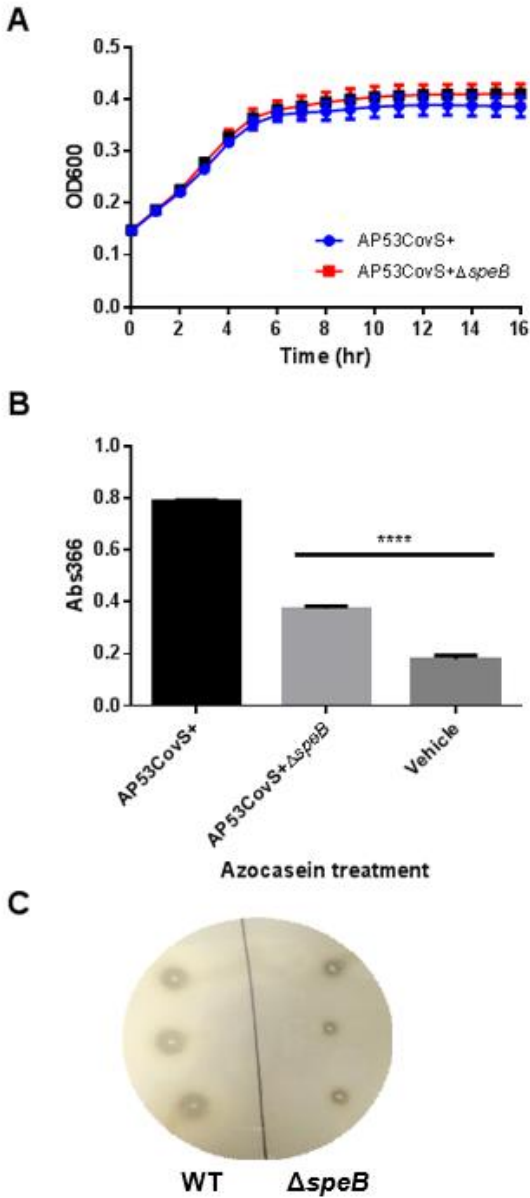

2

3 Figure S1. Characterization of AP53CovS+ GAS strains. (A). Growth curve of GAS  
4 strains AP53CovS+ and AP53CovS+ $\Delta$ speB over 16 hours. (B). Proteolytic activity of  
5 GAS strain supernatants measured by azocasein digest. Vehicle control is THY media.

6 (C). Zones of clearing around stabs of GAS strains in milk agar as visualization of  
7 casein digest by AP53CovS+ (WT, left) and AP53CovS+ $\Delta$ speB (right).

8 Figure S2.

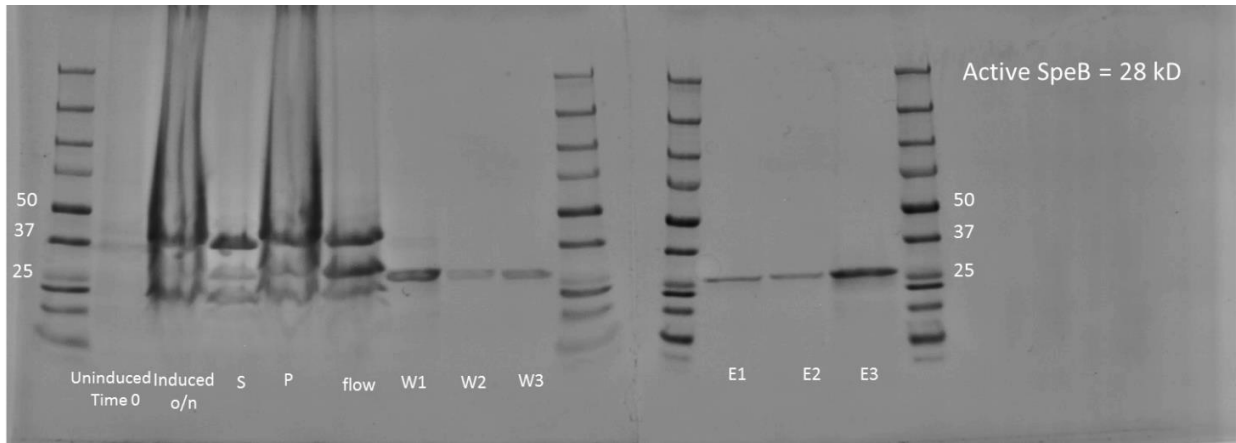

9

10 Figure S2. Purification of recombinant SpeB. The speB gene was cloned into pET42a  
11 plasmid with a C-terminal His tag. Expression was induced in BL-21 cells with IPTG,  
12 and the soluble fraction of the cell lysate was purified on a Ni-NTA column. Fractions  
13 were run on SDS-PAGE. S = soluble fraction P = pellet fraction W = washes E = elutions

14

15

16

17

18

19

20

21

22

23 Figure S3.

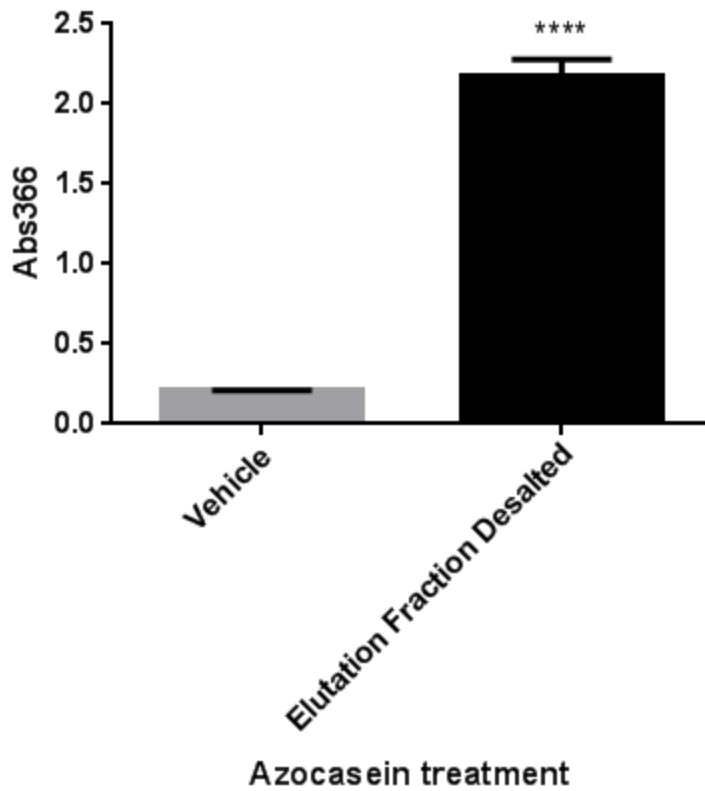

24

25 Figure S3. Azocasein digest of elution fraction from r-SpeB purification. Purified protein  
26 was incubated with azocasein reagent, and color change in the supernatant was read at  
27 366 nm as compared to a vehicle control of elution buffer.

28

29

30

31

32

33 Figure S4.

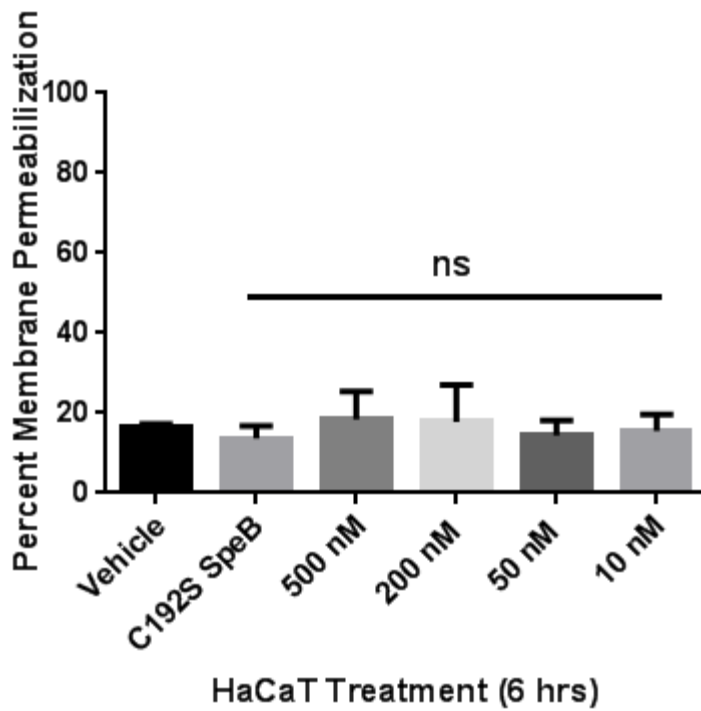

34

35 Figure S4. Cytotoxicity of r-SpeB on human keratinocytes (HaCaTs). HaCaT cells were  
36 incubated with r-SpeB and cytotoxicity was assayed by ethidium homodimer uptake  
37 after 6 hours to assess membrane permeabilization. Vehicle control of PBS was used to  
38 assess baseline cytotoxicity.

39

40

41

42

43

44 Figure S5.

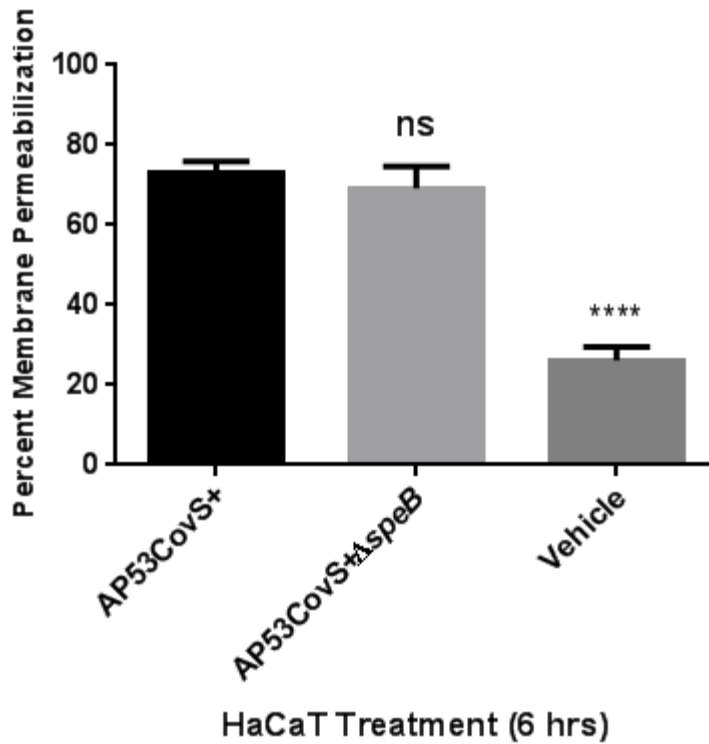

45

46 Figure S5. Cytotoxicity of AP53CovS+ and AP53CovS+ΔspeB infection. HaCaT cells  
47 were incubated with GAS strains at an MOI of 10 bacteria per host cell and cytotoxicity  
48 was assayed by ethidium homodimer uptake after 6 hours to assess membrane  
49 permeabilization. Vehicle control of THY media was used to assess baseline  
50 cytotoxicity.

51

52

53

54

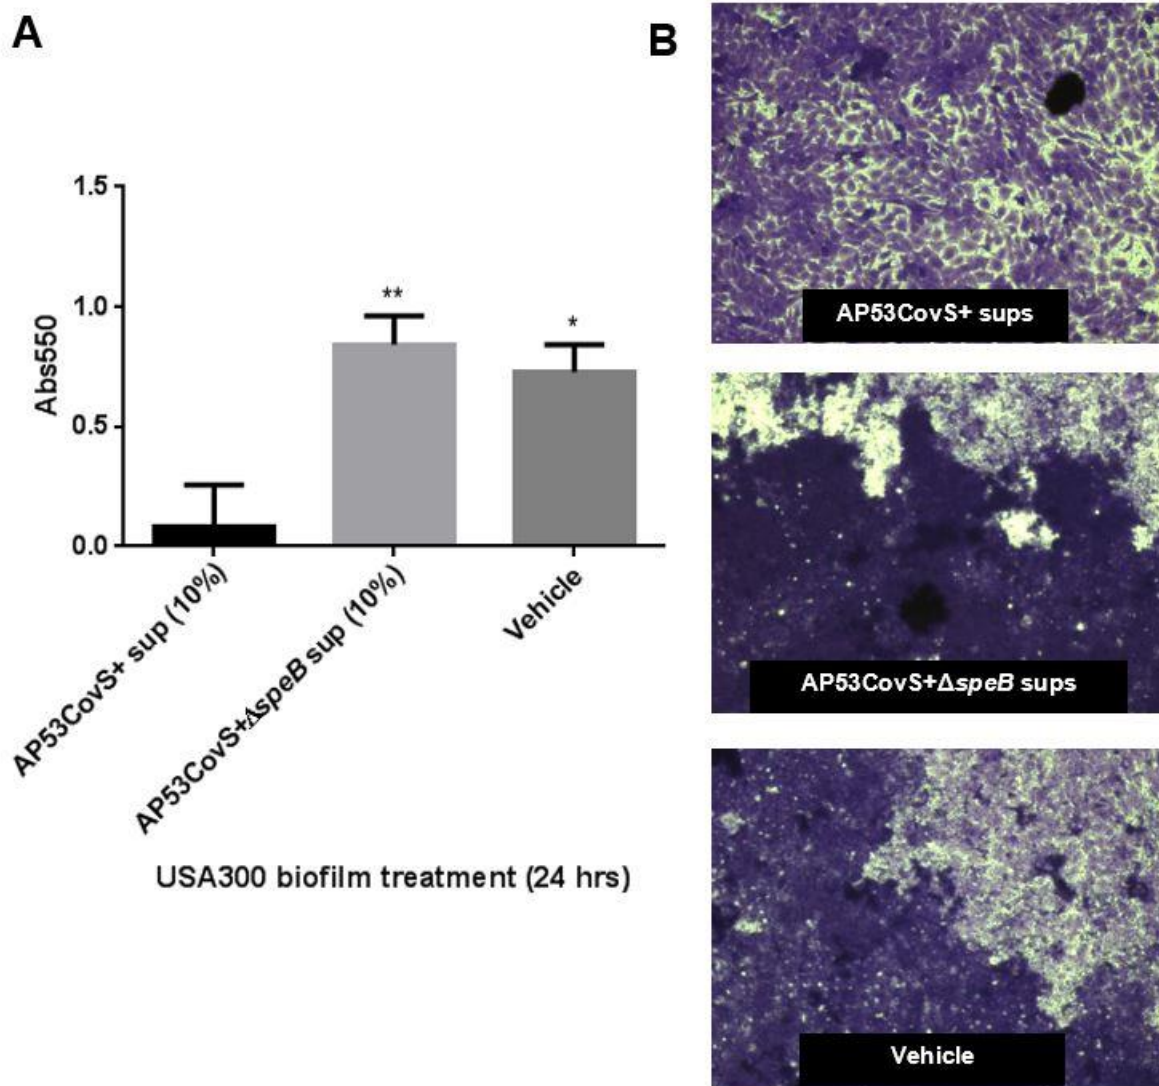

56

57 Figure S6. SpeB-mediated disruption of *S. aureus* biofilm formation on HaCaT cells.  
58 HaCaT cells were fixed in 4% paraformaldehyde prior to the addition of *S. aureus*  
59 cultures treated with GAS culture supernatants. (A). Quantification of crystal violet  
60 staining of *S. aureus* biofilms on HaCaT monolayer following 24 hours of GAS  
61 supernatant treatment. Absorbance values were normalized to crystal violet staining of  
62 uninfected HaCaT cells. \*\* $p < .01$  \* $p < .05$  (B). Representative images of crystal violet

63 stained HaCaTs with *S. aureus* biofilms after 24-hour treatment with AP53CovS+  
64 supernatant (top), AP53CovS+ $\Delta$ *speB* supernatant (middle), or media vehicle with no  
65 GAS supernatant (bottom).

66

67 Video S1. USA300 biofilms treated with 100 nM r-SpeB for 6 hours in PBS. Images  
68 were taken every 10 minutes using differential interference contrast (DIC)

69

70 Video S2. USA300 biofilms treated with media vehicle for 6 hours PBS. Images were  
71 taken every 10 minutes using differential interference contrast (DIC)

72

73

74

75

76

77

78

79

80

81

82 Figure S7.

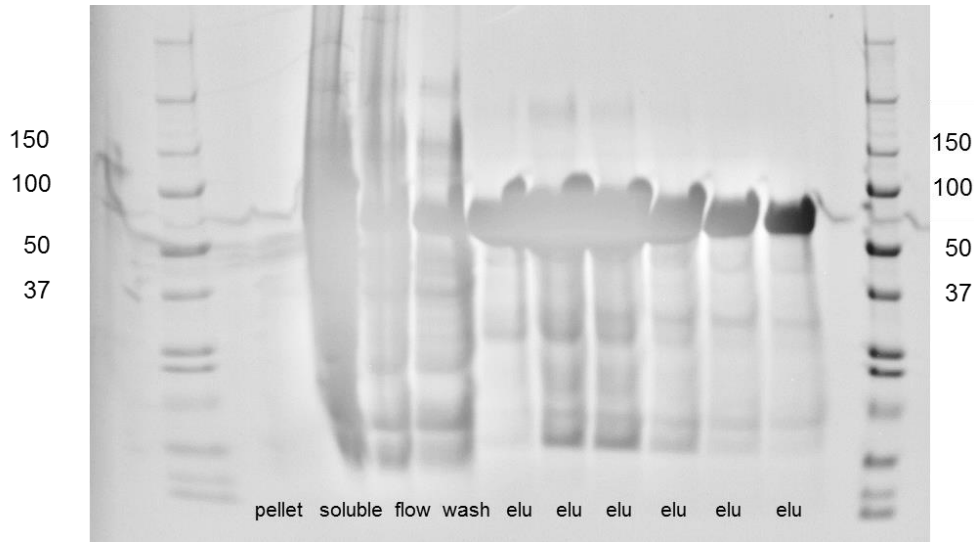

83

84 Figure S7. Purification of recombinant SdrC A Region. The SdrC gene corresponding to  
85 the A region, minus the signal sequence, was cloned into pET15 with a N-terminal His  
86 tag. Expression was induced in BL-21 cells with IPTG, and the soluble fraction of the  
87 cell lysate was purified on a Ni-NTA column. Fractions were run on SDS-PAGE. elu =  
88 elution fraction

89

90

91

92

93

94

95



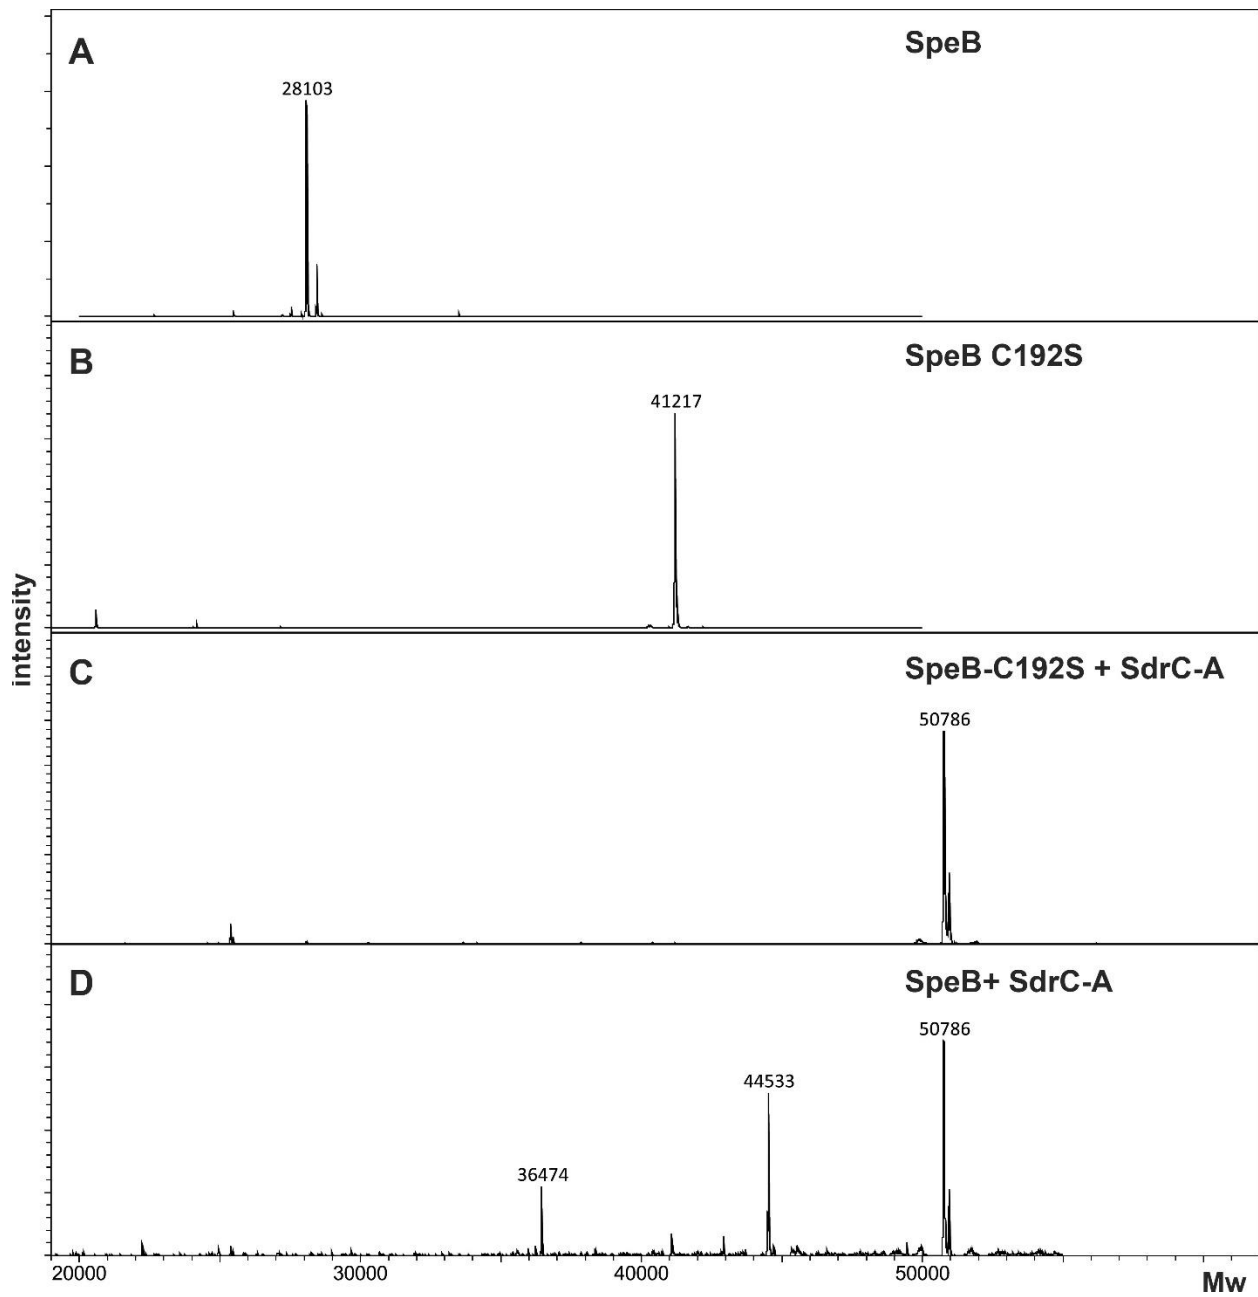

97

98 Figure S8. Deconvoluted mass spectra of (A) SpeB, of (B) SpeB[C<sup>192</sup>S], of reactions of  
99 SprC-A catalyzed by (C) SpeB[C<sup>192</sup>S] and by (D) SpeB from LC/MS analysis

100
